# Supplementary material for: Discovery and Preclinical Validation of Salivary Transcriptomic and Proteomic Biomarkers for the Non-Invasive Detection of Breast Cancer
Source: PLOS journal article supplement (doi:10.1371/journal.pone.0015573), 2010-12-31

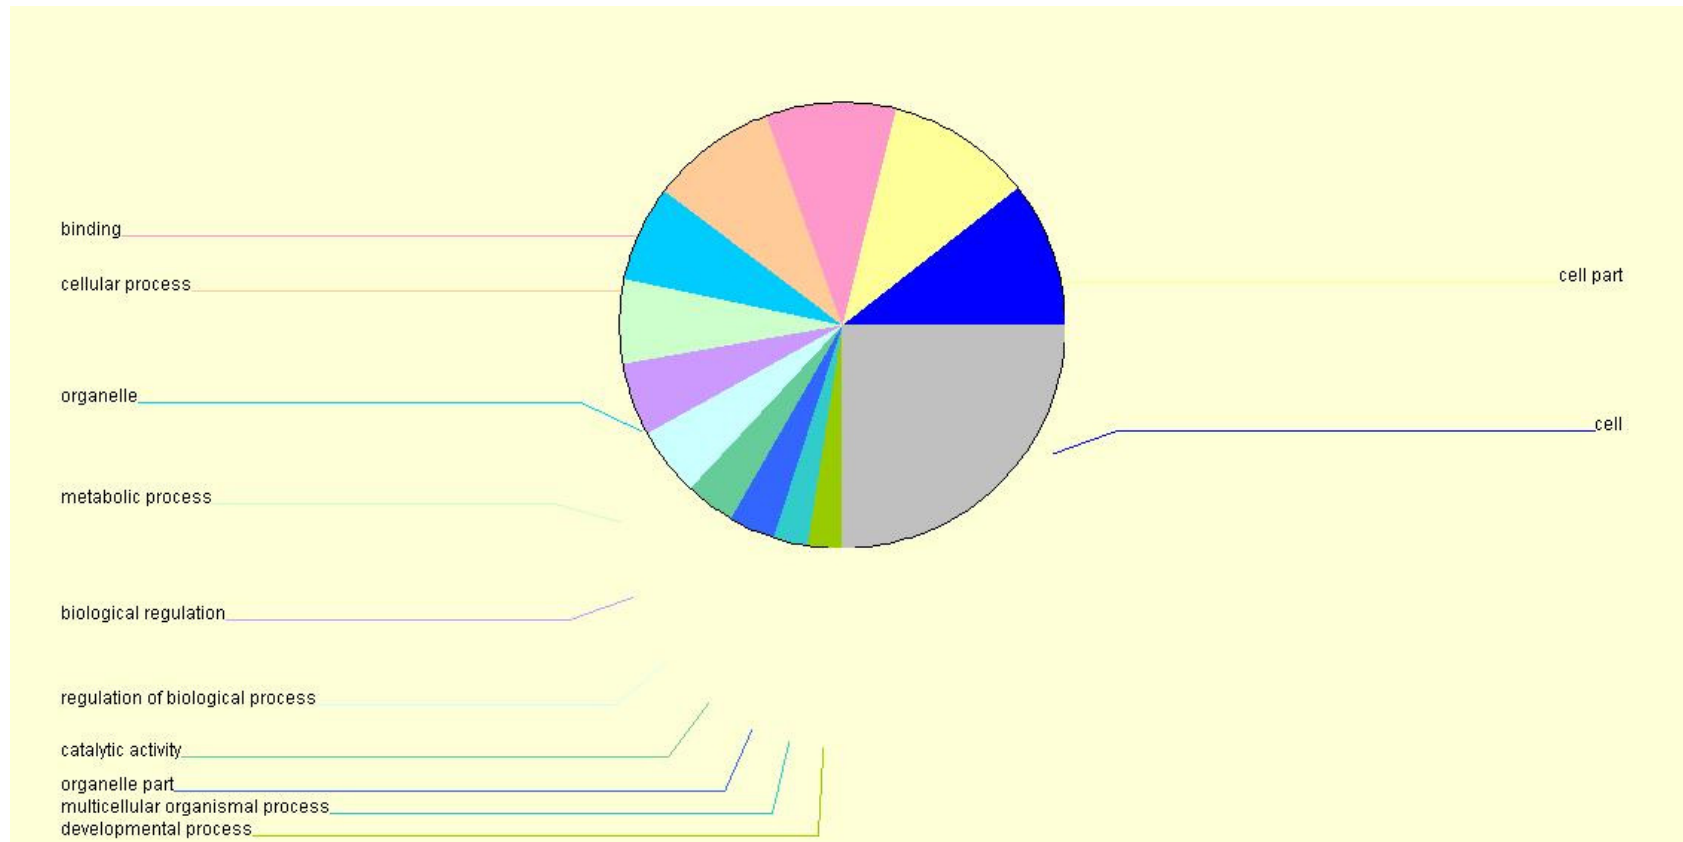

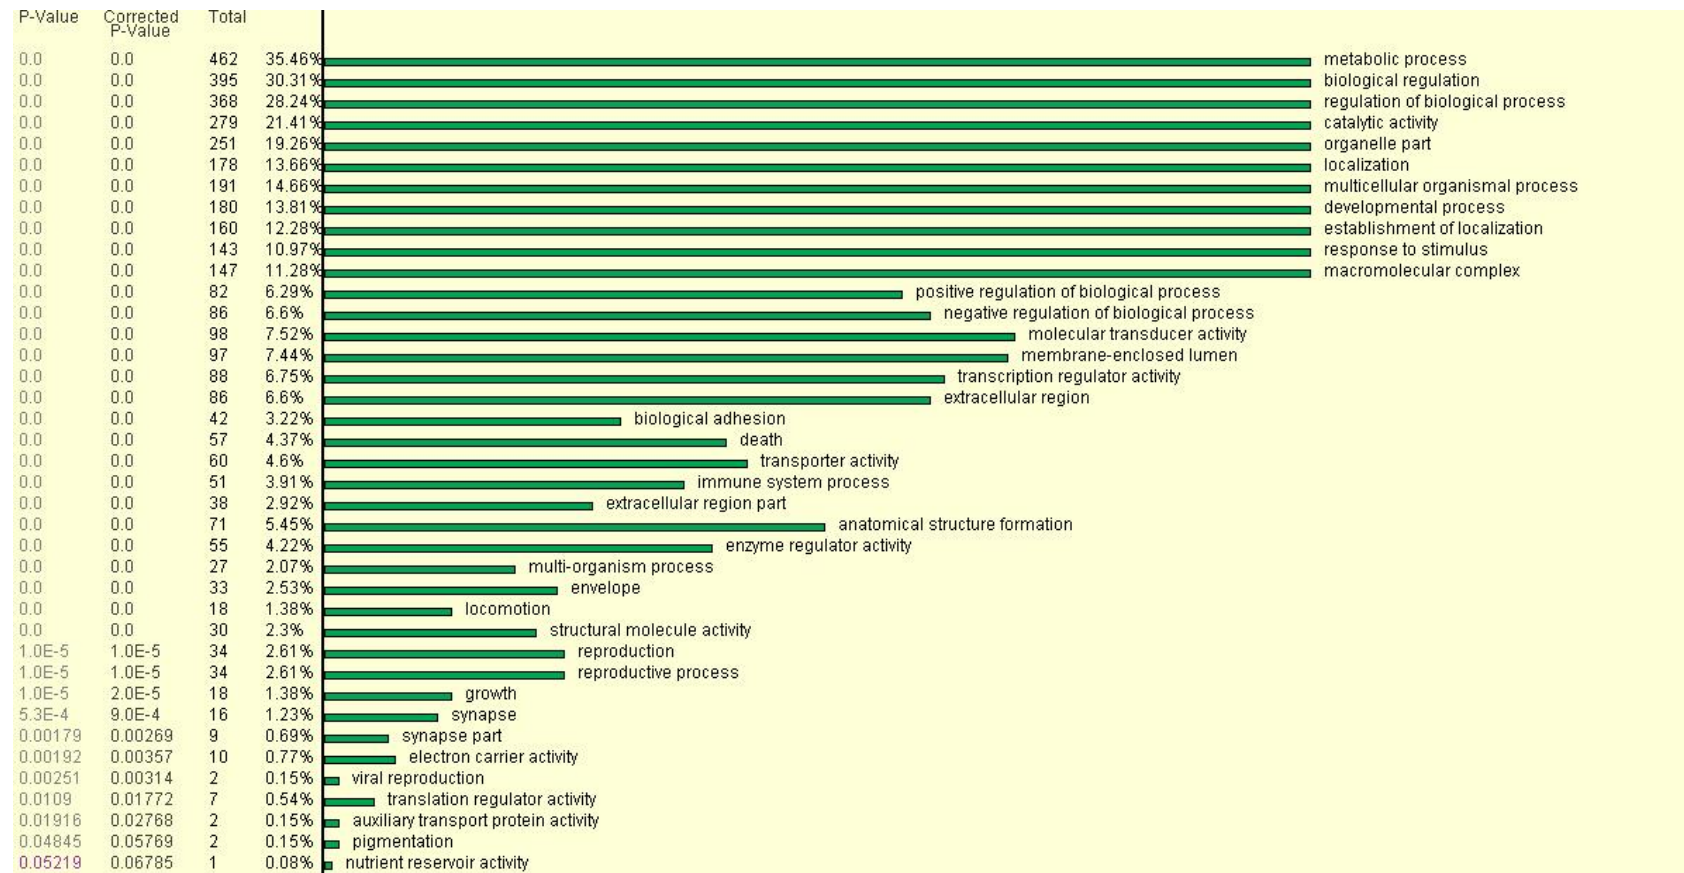

Supplement: S1 (10.1371/journal.pone.0015573.s001) [file journal.pone.0015573.s001]
